# Supplementary material for: PakB binds to the SH3 domain of Dictyostelium Abp1 and regulates its effects on cell polarity and early development
Source: PubMed Central journal article supplement — Mol Biol Cell. 2013 Jul 15;24(14):2216–27. doi: 10.1091/mbc.E12-12-0883 (PMC3708727; doi:10.1091/mbc.e12-12-0883), 2013-07-15

## Supplemental Files For

### **PakB Binds to the SH3 domain of Dictyostelium Abp1 and Regulates its Effects on Cell Polarity and Early Development**

Yidai Yang, Marc de la Roche, Scott Crawley, Zhihao Li, Emilia Furmaniak-Kazmierczak, and Graham P. Côté

**Video S1.** Localization of GFP-PakB-1-276 in developed, migrating AX3 cells. GFP-PakB-1-276 localizes to the rear of the migrating cell. Bar, 10  $\mu\text{m}$ .

**Video S2.** Localization of GFP-PakB-1-180 in developed, migrating AX3 cells. GFP-PakB-1-180 is enriched at the leading edge of the migrating cells. Bar, 10  $\mu\text{m}$ .

**Video S3.** Localization of GFP-PakB-1-180 in growth phase AX3 cells. GFP-PakB-1-180 is enriched in pseudopodia and macropinocytic cups of growth phase AX3 cells. Bar, 10  $\mu\text{m}$ .

**Video S4.** Localization of RFP-dAbp1 in developed, migrating AX3 cells. RFP-dAbp1 is enriched at the leading edge of the migrating cells. Bar, 10  $\mu\text{m}$ .

**Video S5.** Localization of RFP-dAbp1 in developed, migrating PakB<sup>-</sup> cells. RFP-dAbp1 exhibits a diffuse distribution in the absence of PakB.

**Figure S1. Localization of PakB and PakB-1-180 in PakB<sup>-</sup> cells.** (A) Immunofluorescence localization of PakB and GFP-PH-Crac in AX3 cells. Cells expressing GFP-PH-Crac were fixed and stained with anti-GFP and anti-PakB antibodies. PakB localized to the cell cortex and within pseudopods. PH-Crac was largely cytosolic but some co-localization to the leading edge of pseudopods was apparent. Bar, 10  $\mu\text{m}$ . (B) Time course images of a polarized, aggregation competent PakB<sup>-</sup> cell expressing PakB-GFP. PakB was localized to the anterior of the cell and to pseudopods extended from the lateral edge. Arrow shows the direction of migration. Bar, 10  $\mu\text{m}$ . (C) Time course images of randomly migrating PakB<sup>-</sup> cells expressing GFP-PakB-1-180. Similar to PakB, PakB-1-180 localized to the anterior of cells and to extending pseudopods. The arrow indicates a cell that sharply changed direction. PakB-1-180 was lost from the existing leading edge and reappeared at the newly protruding leading edge. Bar, 10  $\mu\text{m}$ .

**Figure S2. Profile plots of polarized migrating cells expressing GFP, PakB-GFP and GFP-PakB-1-180.**

Images of cells expressing GFP, PakB-GFP (from Fig. S1A) and GFP-PakB-1-180 (from Fig. S1B) were analyzed using the ImageJ Analyze>Plot Profile function. Profile plots through the centers of the cells (boxes) show that GFP is relatively evenly distributed throughout the length of the cell, whereas PakB and PakB-1-180 are enriched within the leading edge pseudopod. Arrows indicate the direction of migration. Bar, 10  $\mu\text{m}$ .

**Figure S3. Actin filament distribution in PakB<sup>-</sup> cells.** The time course images show aggregation competent PakB<sup>-</sup>/dAbp1<sup>OE</sup> cells expressing GFP-ABD (the actin-binding domain from ABP-120) as a marker for filamentous actin. Recruitment of GFP-ABD to the cell periphery shows that PakB<sup>-</sup> cells remain capable of assembling cortical actin filaments. The diffuse localization of RFP-dAbp1 is consistent with the conclusion that PakB is needed for it to localize to actin-rich regions. Arrow indicates the direction of migration. Bars, 10  $\mu\text{m}$ .

**Figure S4. Localization of PakB-1-180 in cells that cannot produce PIP<sub>3</sub>.** (A) GFP, GFP-ABD, GFP-dAbp1 and GFP-PakB-1-180 were expressed in a cell line that is unable to produce PIP<sub>3</sub> due to the loss of all PI3Ks and PTEN. Images of individual live cells show that GFP exhibits a diffuse distribution, whereas GFP-ABD, GFP-dAbp1 and GFP-PakB-1-180 localize to cortical regions and pseudopods. Bar, 10  $\mu\text{m}$ .

**Figure S5. Expression and localization of RFP-dAbp1- $\Delta$ SH3.** (A) The immunoblot shows lysates of PakB<sup>-</sup> cells expressing RFP-dAbp1- $\Delta$ SH3 or RFP-dAbp1 probed using an anti-dAbp1 antibody. (B) Time course images of aggregation competent PakB<sup>-</sup> cells expressing GFP-ABD and RFP-dAbp1- $\Delta$ SH3. GFP-ABD localized to the cell cortex, the leading edge pseudopod and the rear of the cell, whereas RFP-dAbp1- $\Delta$ SH3 exhibited a diffuse localization. Arrow indicates the direction of migration. Bars, 10  $\mu\text{m}$ .

# Figure S1

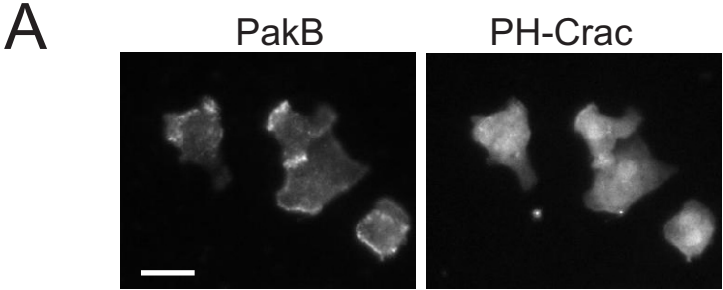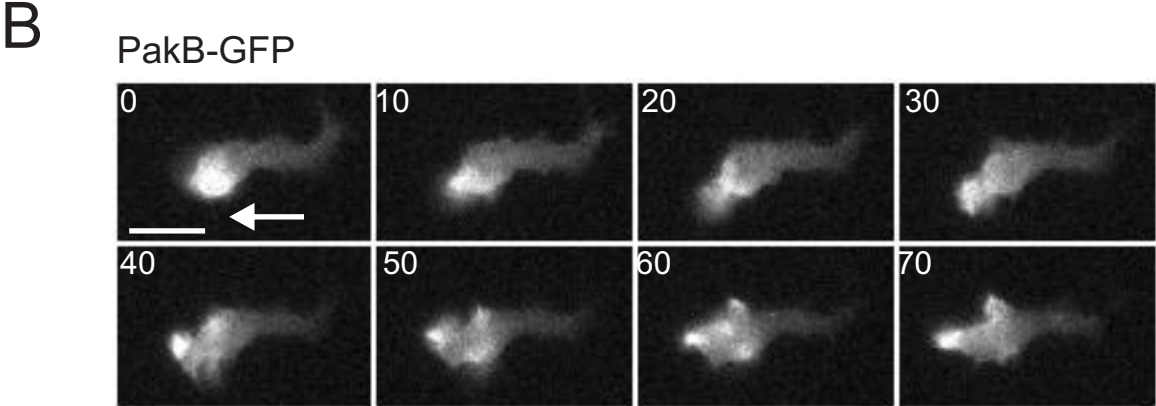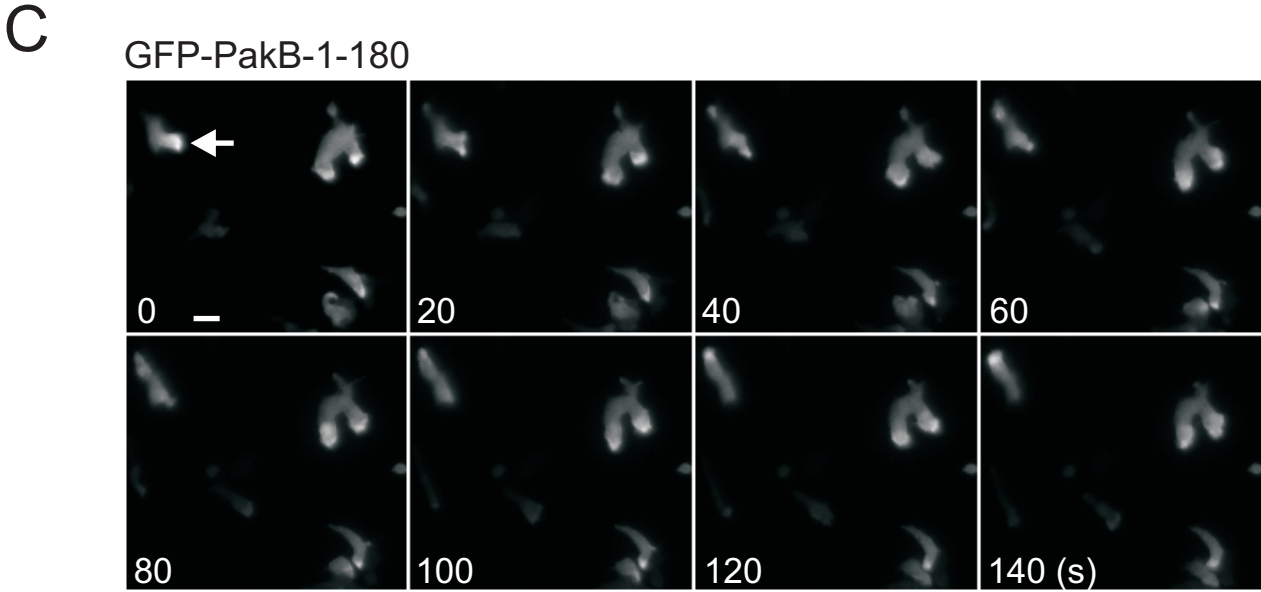

Figure S2

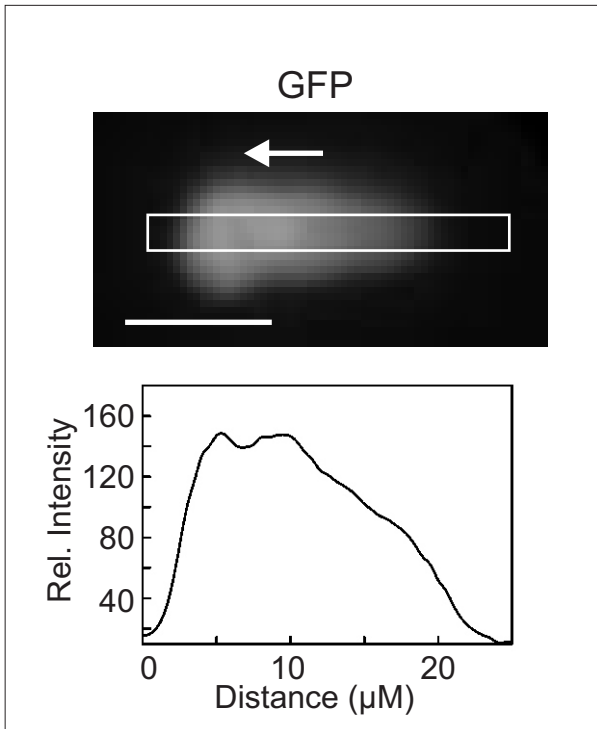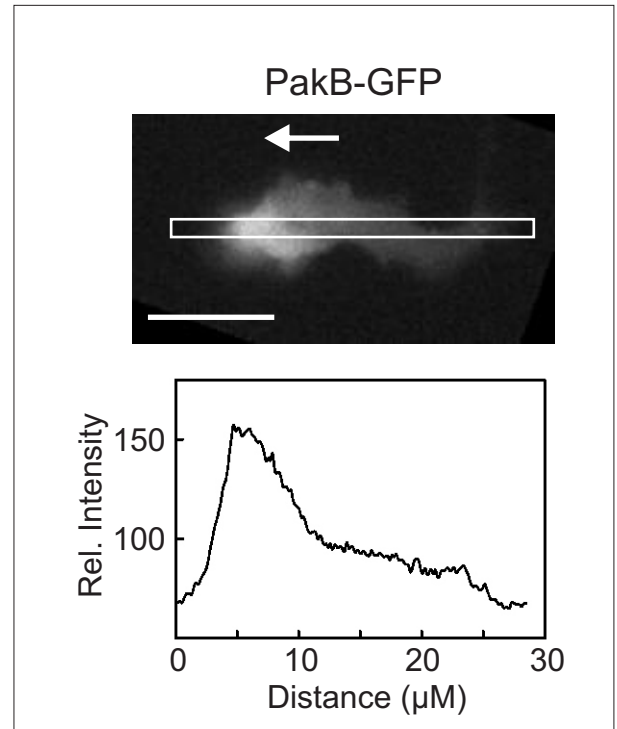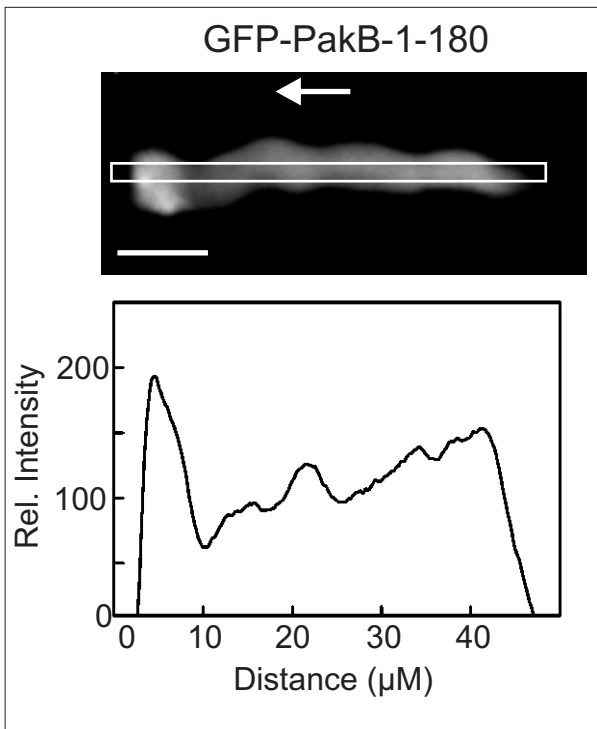

Figure S3

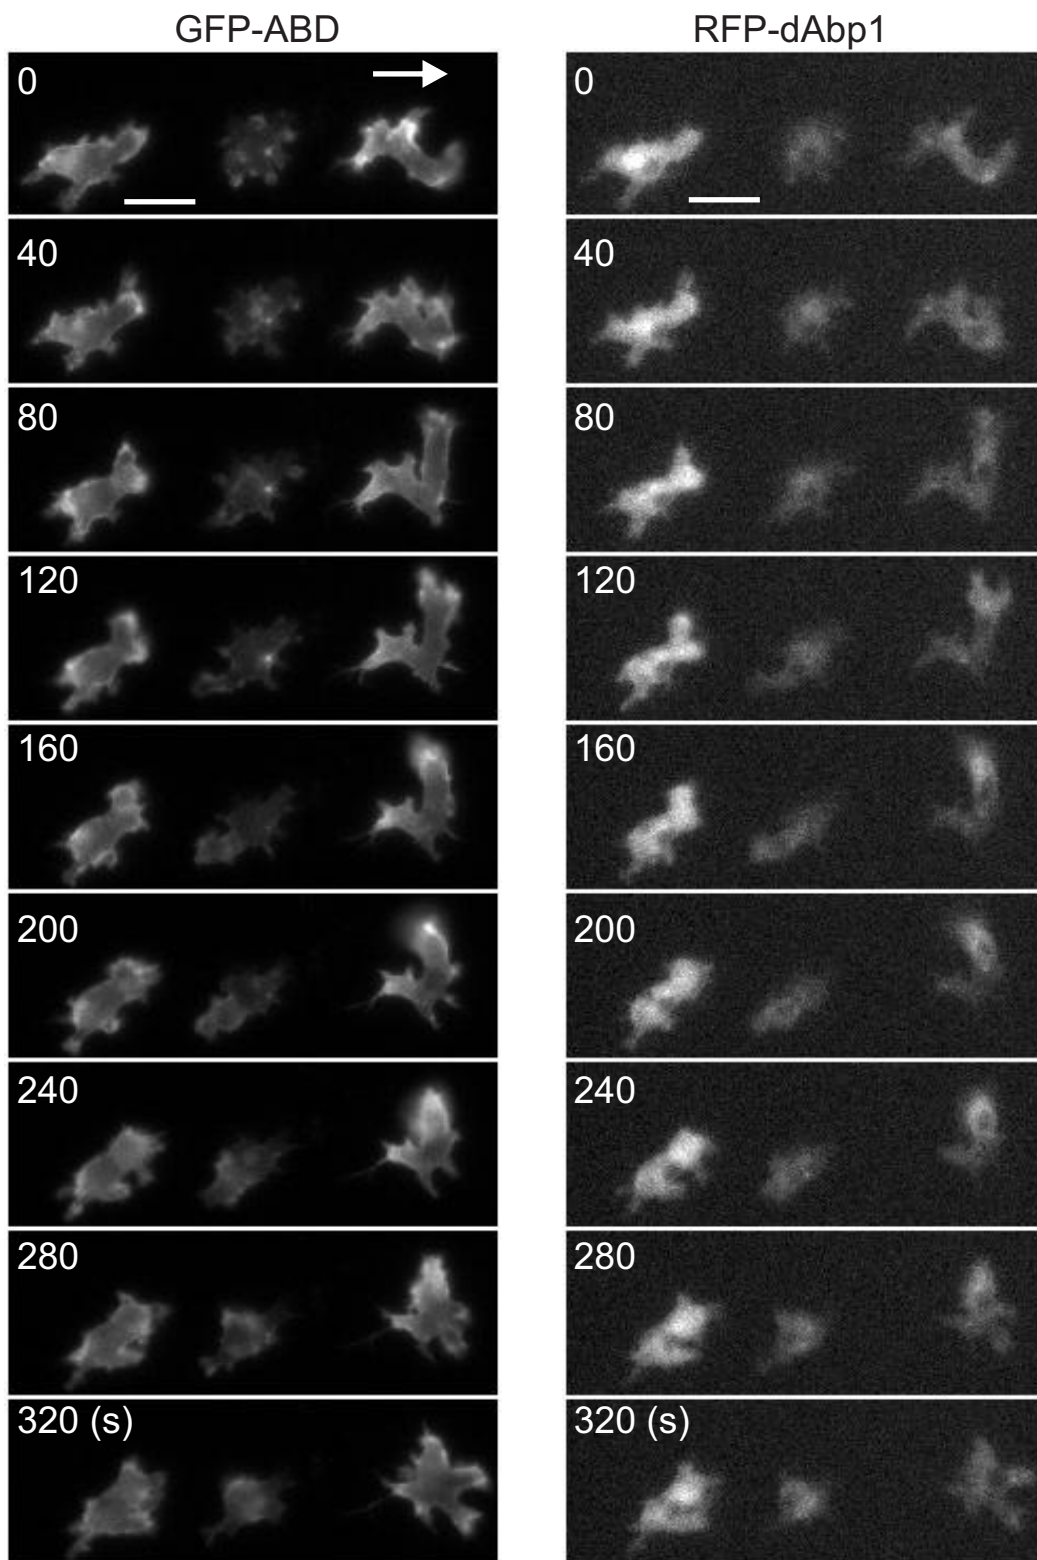

Figure S4

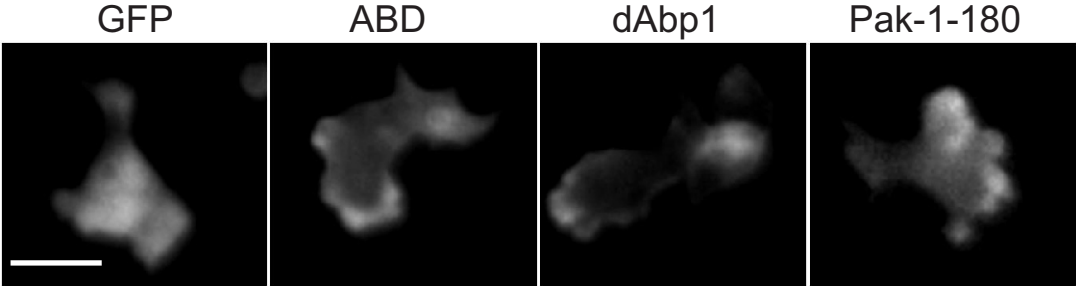

# Figure S5

## A

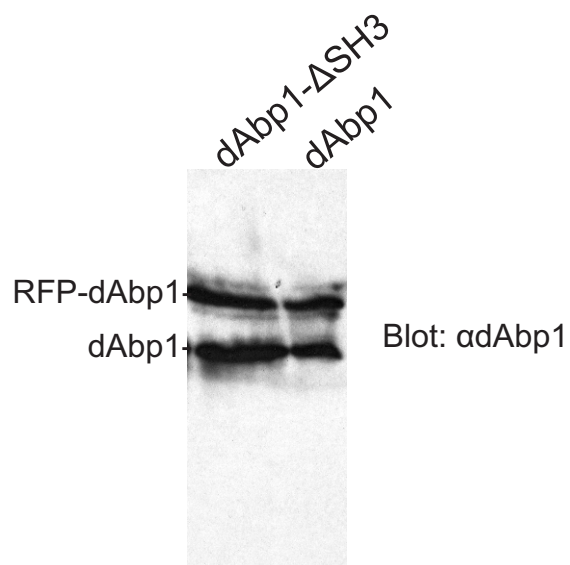

## B

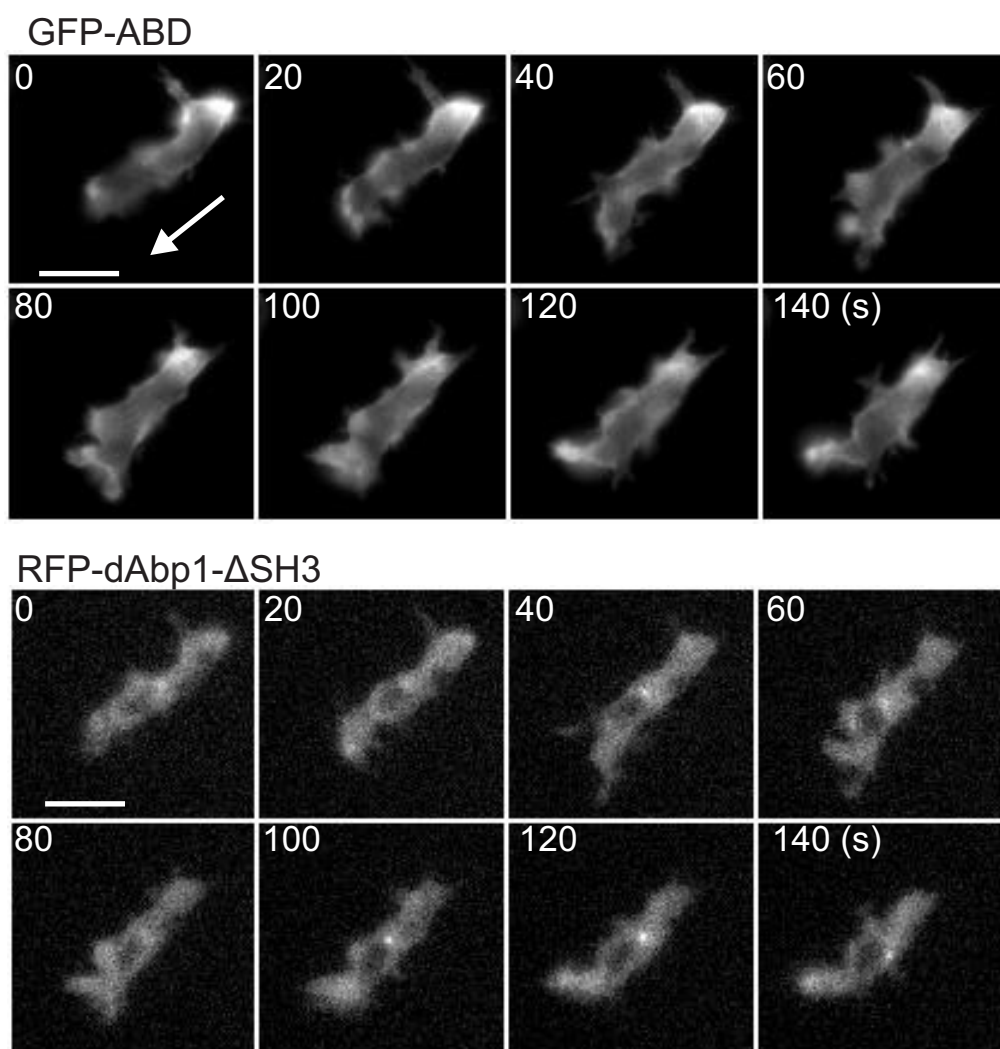

Supplement: supp_E12-12-0883v1_E12-12-0883_Supplementaldata.pdf [file supp_E12-12-0883v1_E12-12-0883_Supplementaldata.pdf]
